# Supplementary material for: Efficient and zero thermal quenching Sm3+-activated Li2LaTiTaO7 phosphor for white LEDs
Source: Royal Society of Chemistry journal article supplement (doi:10.1039/d3dt00609c), 2023-01-01
Supplement: d3dt00609c1.pdf [file d3dt00609c1.pdf]

## Supporting Information

### Efficient and zero thermal quenching Sm<sup>3+</sup>-activated

### Li<sub>2</sub>LaTiTaO<sub>7</sub> phosphor for white LEDs

Qi Wang<sup>a,b,c</sup>, Shangwei Wang<sup>b,c</sup>, Ran Pang<sup>c\*</sup>, Taixing Tan<sup>b</sup>, Herui Wen<sup>a</sup>, Su Zhang<sup>c</sup>,  
Hongpeng You<sup>a,b,c\*</sup>, Chengyu Li<sup>a,b,c</sup>, Hongjie Zhang<sup>c</sup>

*\* Corresponding author.*

*E-mail addresses:* pangran@ciac.ac.cn (R. Pang), hpyou@ciac.ac.cn (H. You)

<sup>a</sup> *Faculty of Materials Metallurgy and Chemistry, Jiangxi University of Science and Technology, Ganzhou, Jiangxi 341000, P. R. China*

<sup>b</sup> *Ganjiang Innovation Academy, Chinese Academy of Sciences, Ganzhou 341000, P. R. China*

<sup>c</sup> *State key Laboratory of Rare Earth Resource Utilization, Changchun Institute of Applied Chemistry, Chinese Academy of Sciences, Changchun 130022, P. R. China*

## Figures and Figure Captions

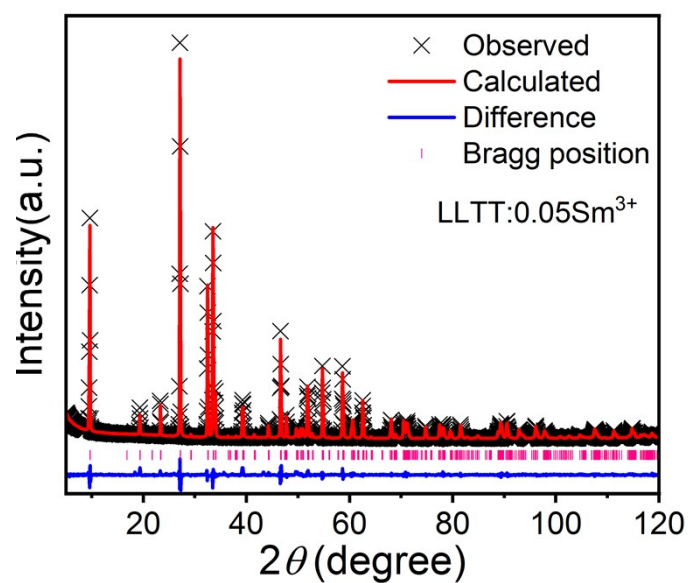

Fig. S1 Rietveld refinement of LLTT:0.05Sm<sup>3+</sup> sample.

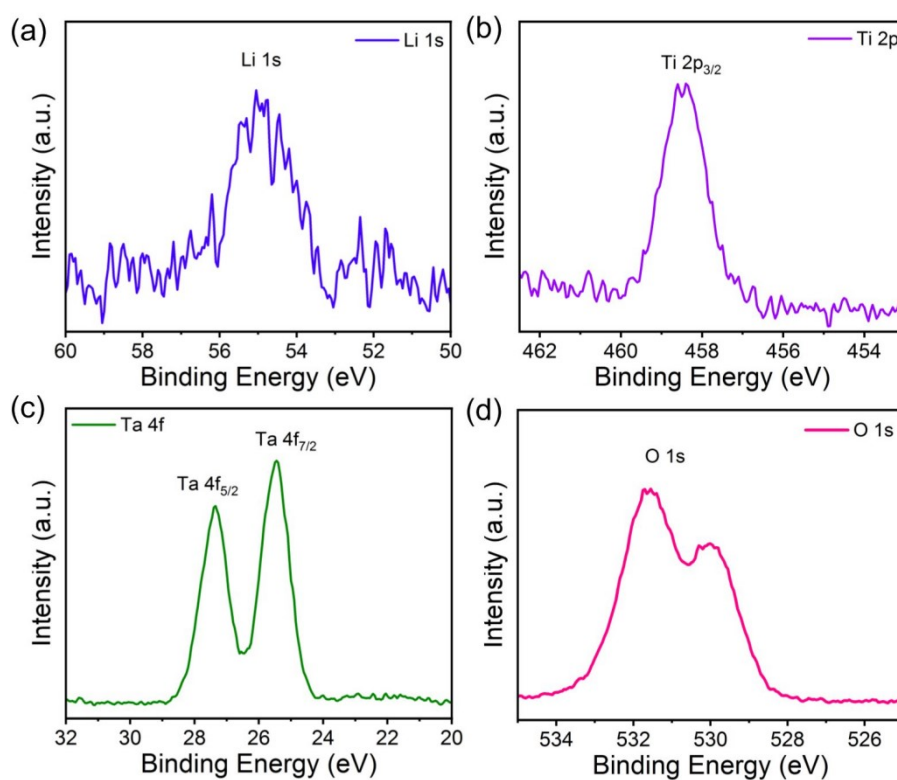

Fig. S2 (a)-(d) high-resolution XPS spectra of Li 1s, Ti 2p, Ta 4f, and O 1s, respectively.

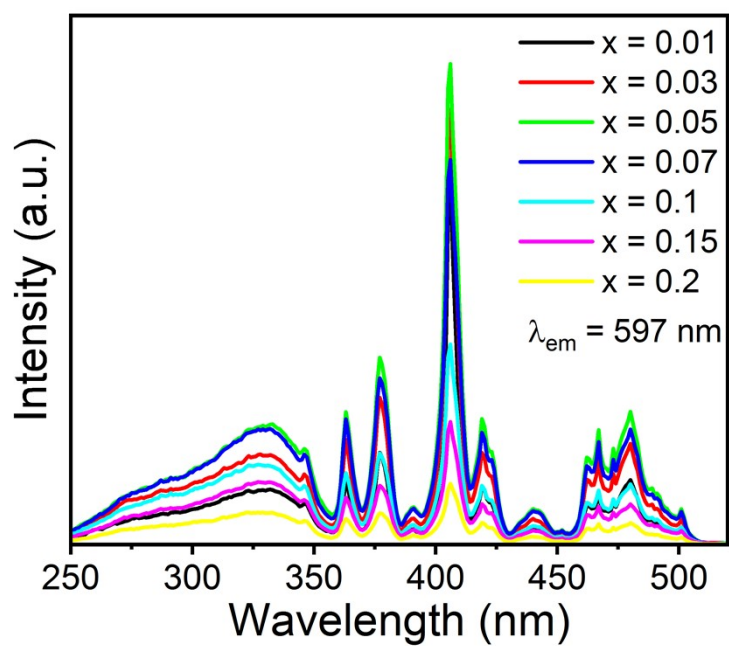

Fig. S3 (a) PLE spectra of LLTT: $x\text{Sm}^{3+}$  samples with varied  $x$  values monitored at 597 nm.

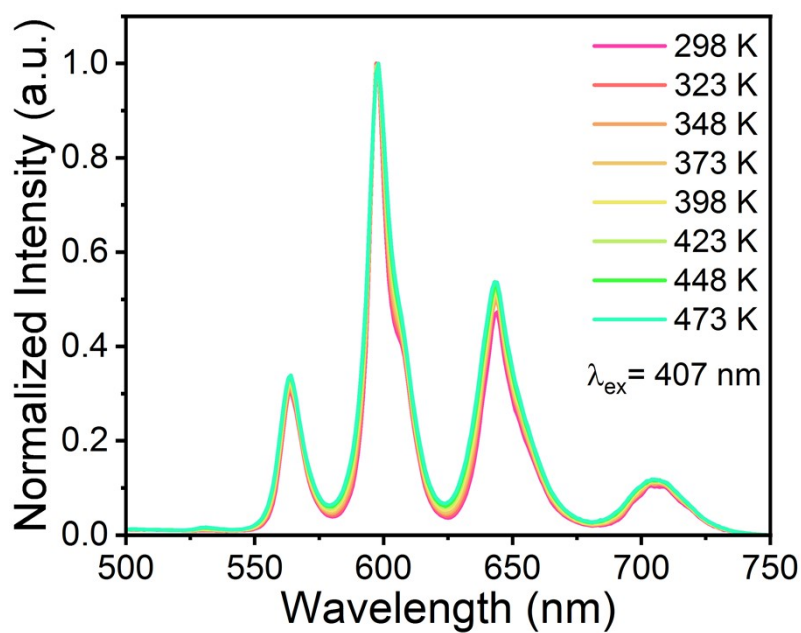

Fig. S4 Temperature-dependent Normalized PL spectra of the LLTT:0.05 $\text{Sm}^{3+}$  sample (298-473 K).

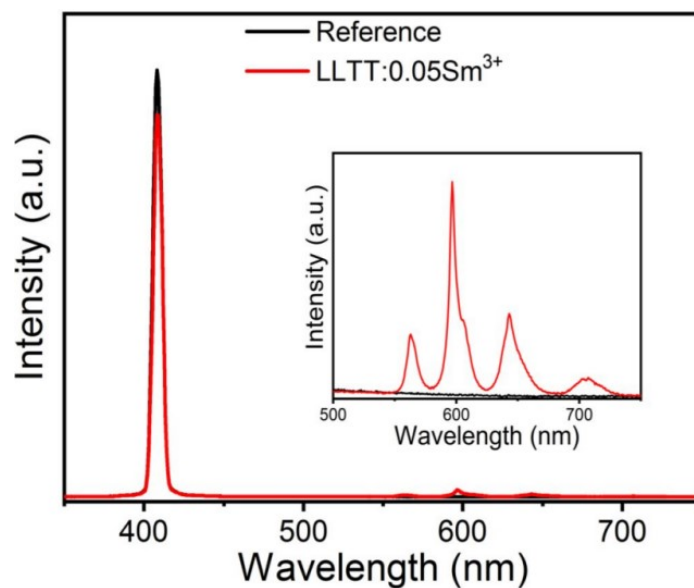

Fig. S5 The spectra of the LLTT:0.05Sm<sup>3+</sup> sample and the reference sample ( $\lambda_{\text{exc}} = 407 \text{ nm}$ ) in quantum efficiency measurements.

### Tables and Table Captions

Table S1 Rietveld refinement and crystallographic data for the LLTT and LLTT:0.05Sm<sup>3+</sup>.

| Formula                    | LLTT                | LLTT:0.05Sm <sup>3+</sup> |
|----------------------------|---------------------|---------------------------|
| Space group                | <i>Cmcm</i> (No.63) | <i>Cmcm</i> (No.63)       |
| Symmetry                   | Orthorhombic        | Orthorhombic              |
| Units, <i>Z</i>            | 4                   | 4                         |
| <i>a</i> (Å)               | 18.3154(3)          | 18.3343(1)                |
| <i>b</i> (Å)               | 5.5141(1)           | 5.5066(2)                 |
| <i>c</i> (Å)               | 5.5057(1)           | 5.5043(3)                 |
| <i>V</i> (Å <sup>3</sup> ) | 556.04(1)           | 555.72(1)                 |
| <i>R</i> <sub>p</sub> (%)  | 4.8                 | 5.23                      |
| <i>R</i> <sub>wp</sub> (%) | 6.54                | 7.13                      |
| $\chi^2$                   | 3.573               | 3.763                     |

Table S2 Structural parameters of the LLTT determined by Rietveld refinement of the corresponding XRD pattern.

| Atom | Wyck | $x/a$      | $y/b$      | $z/c$ | Occ | $U_{iso}$ |
|------|------|------------|------------|-------|-----|-----------|
| La1  | 4c   | 0.11656(8) | 0.7548(8)  | 1/4   | 1.0 | 0.0200    |
| Ta1  | 8g   | 0.11656(8) | 0.7548(8)  | 1/4   | 0.5 | 0.0187    |
| Ti1  | 8g   | 0.2824(22) | 0          | 0     | 0.5 | 0.0187    |
| Li1  | 8e   | 0          | 0.6970(34) | 1/4   | 1.0 | 0.0220    |
| O1   | 4c   | 0.2126(6)  | 0.7852(33) | 1/4   | 1.0 | 0.0013    |
| O2   | 8g   | 0.6149(8)  | 0          | 0     | 1.0 | 0.0129    |
| O3   | 8e   | 0.0964(8)  | 0          | 0     | 1.0 | 0.0171    |
| O4   | 8e   | 0.11656(8) | 0.7548(8)  | 1/4   | 1.0 | 0.0338    |

Table S3 Structural parameters of the LLTT:0.05Sm<sup>3+</sup> determined by Rietveld refinement of the corresponding XRD pattern.

| Atom | Wyck | $x/a$      | $y/b$      | $z/c$ | Occ  | $U_{iso}$ |
|------|------|------------|------------|-------|------|-----------|
| La1  | 4c   | 0          | 0.2598(10) | 1/4   | 0.95 | 0.0166    |
| Ta1  | 8g   | 0.11691(9) | 0.7542(8)  | 1/4   | 0.5  | 0.0143    |
| Ti1  | 8g   | 0.11691(9) | 0.7542(8)  | 1/4   | 0.5  | 0.0143    |
| Li1  | 8e   | 0.2908(22) | 0          | 0     | 1.0  | 0.0042    |
| O1   | 4c   | 0          | 0.713(6)   | 1/4   | 1.0  | 0.0173    |
| O2   | 8g   | 0.2141(6)  | 0.786(4)   | 1/4   | 1.0  | 0.0061    |
| O3   | 8e   | 0.6190(8)  | 0          | 0     | 1.0  | 0.0101    |
| O4   | 8e   | 0.1015(10) | 0          | 0     | 1.0  | 0.0185    |
| Sm1  | 4c   | 0          | 0.2598(10) | 1/4   | 0.05 | 0.0166    |

Table S4 Average lifetime ( $\tau$ ) of Sm<sup>3+</sup> 597 nm emission in LLTT: xSm<sup>3+</sup> phosphors  
(under 407 nm excitation)

| Sm <sup>3+</sup> (x) | $A_1$   | $\tau_1$ (ms) | $A_2$   | $\tau_2$ (ms) | $\tau_{av}$ (ms) |
|----------------------|---------|---------------|---------|---------------|------------------|
| 0.01                 | 3956.21 | 1.79          | 981.84  | 0.9           | 1.69             |
| 0.03                 | 3374.84 | 1.54          | 1436.92 | 0.61          | 1.41             |
| 0.05                 | 2912.57 | 1.36          | 2056.93 | 0.54          | 1.18             |
| 0.07                 | 2529.63 | 1.19          | 2415.97 | 0.45          | 0.99             |
| 0.1                  | 1845.5  | 1.06          | 3219.24 | 0.42          | 0.8              |
| 0.15                 | 1614.02 | 0.76          | 3273.32 | 0.31          | 0.56             |
| 0.2                  | 2094.91 | 0.5           | 2662.12 | 0.2           | 0.4              |

## Supplementary Notes

### Supplementary Note 1:

The percentage difference in radius ( $D_r$ ) should be explored to further ensure that the Sm<sup>3+</sup> ion may be readily doped into the LLTT host, which could be calculated using the following formula:<sup>1</sup>

$$D_r = \frac{R_l(\text{CN}) - R_2(\text{CN})}{R_l(\text{CN})} \quad (\text{S1})$$

where the radius of the activated Sm<sup>3+</sup> ions ( $R_2$  (CN)) and the potential superseded La<sup>3+</sup> ions ( $R_l$  (CN)) are 1.24 and 1.36 Å, respectively, when the coordination number (CN) is 12.

## Supplementary References

1. M. Peng, Z. Pei, G. Hong and Q. Su, *J. Mater. Chem.*, 2003, **13**, 1202-1205.
